# Supplementary material
Source: PubMed Central journal article supplement (PMC4667103)
Supplement: mmc1.pdf [file mmc1.pdf]

The American Journal of Human Genetics

Supplemental Data

## **Joubert Syndrome in French Canadians and Identification of Mutations in *CEP104***

**Myriam Srour, Fadi F. Hamdan, Dianalee McKnight, Erica Davis, Hanna Mandel, Jeremy Schwartzentruber, Brissa Martin, Lysanne Patry, Christina Nassif, Alexandre Dionne-Laporte, Luis H. Ospina, Emmanuelle Lemyre, Christine Massicotte, Rachel Laframboise, Bruno Maranda, Damian Labuda, Jean-Claude Décarie, Françoise Rypens, Dorith Goldsher, Catherine Fallet-Bianco, Jean-François Soucy, Anne-Marie Laberge, Catalina Maffei, Care4Rare Canada Consortium, Kym Boycott, Bernard Brais, Renée-Myriam Boucher, Guy A. Rouleau, Nicholas Katsanis, Jacek Majewski, Orly Elpeleg, Mary K. Kukulich, Stavit Shalev, and Jacques L. Michaud**

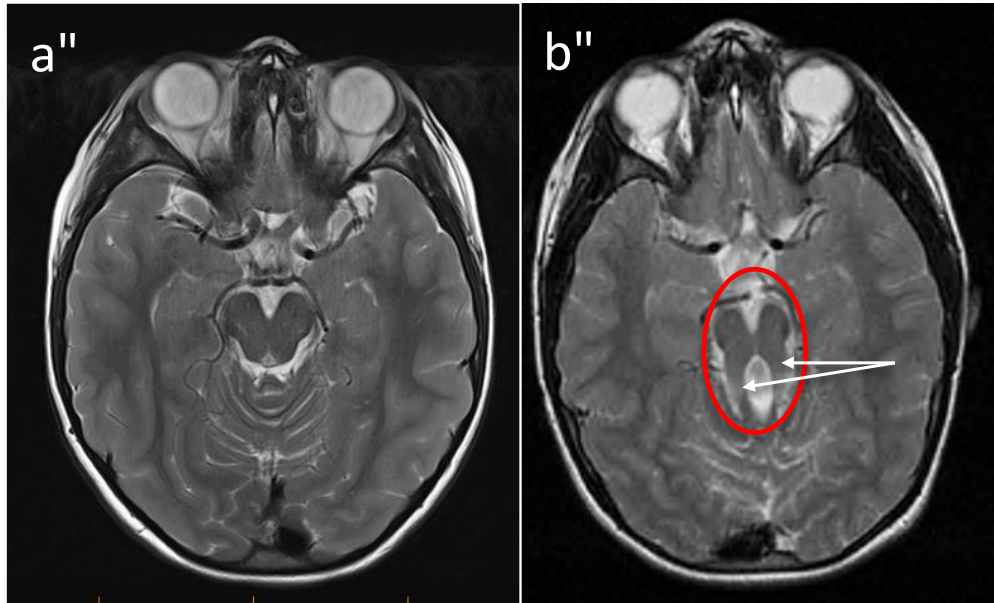

**Figure S1. Molar Tooth Sign on MRI.** Axial T2 brain MRI of a control individual (a) and patient with JBTS (b). Note the molar tooth sign (red circle), thickened and abnormally oriented superior cerebellar peduncles (white arrows) and deepened interpeduncular fossa.

Family'472'(C2CD3,'NM\_001286577.1')

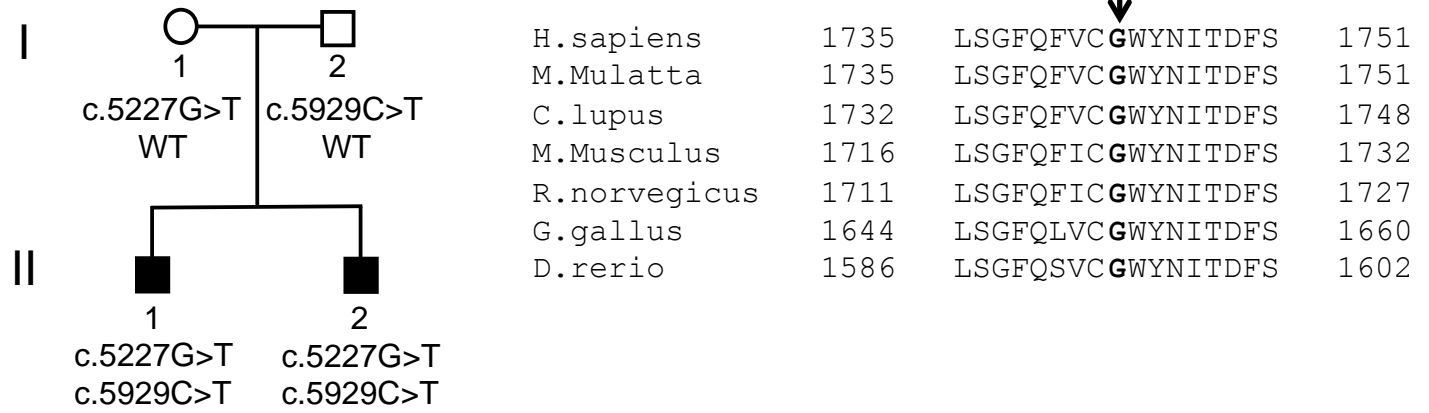

**Figure S2.** Segregation of mutations in *C2CD3*. The panel on the right shows conservation of the affected amino acid in *C2CD3*. Amino acid alignments were generated using homologue (NCBI).

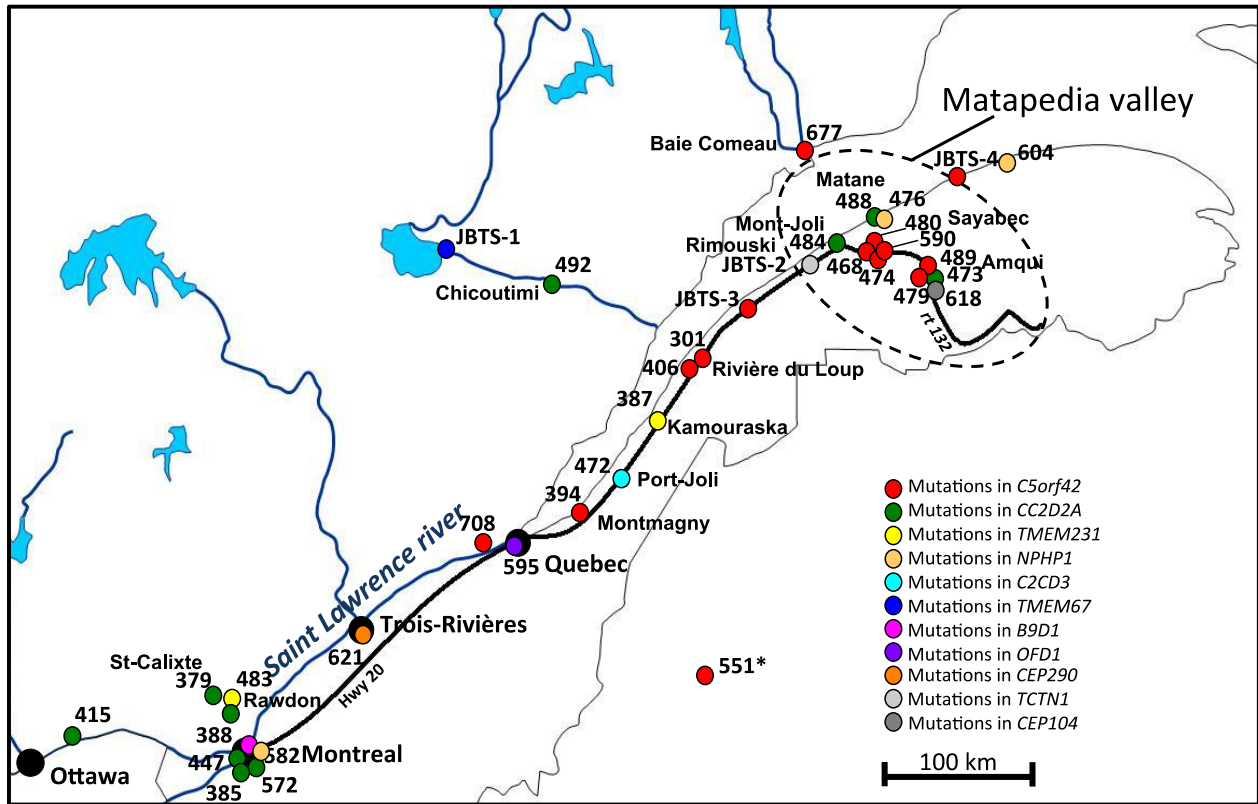

**Figure S3.** Map of Quebec showing the geographic distribution and the genetic heterogeneity of FC families with JBTS. \*Note that this individual is of FC ancestry, but born and living in the United States of America.

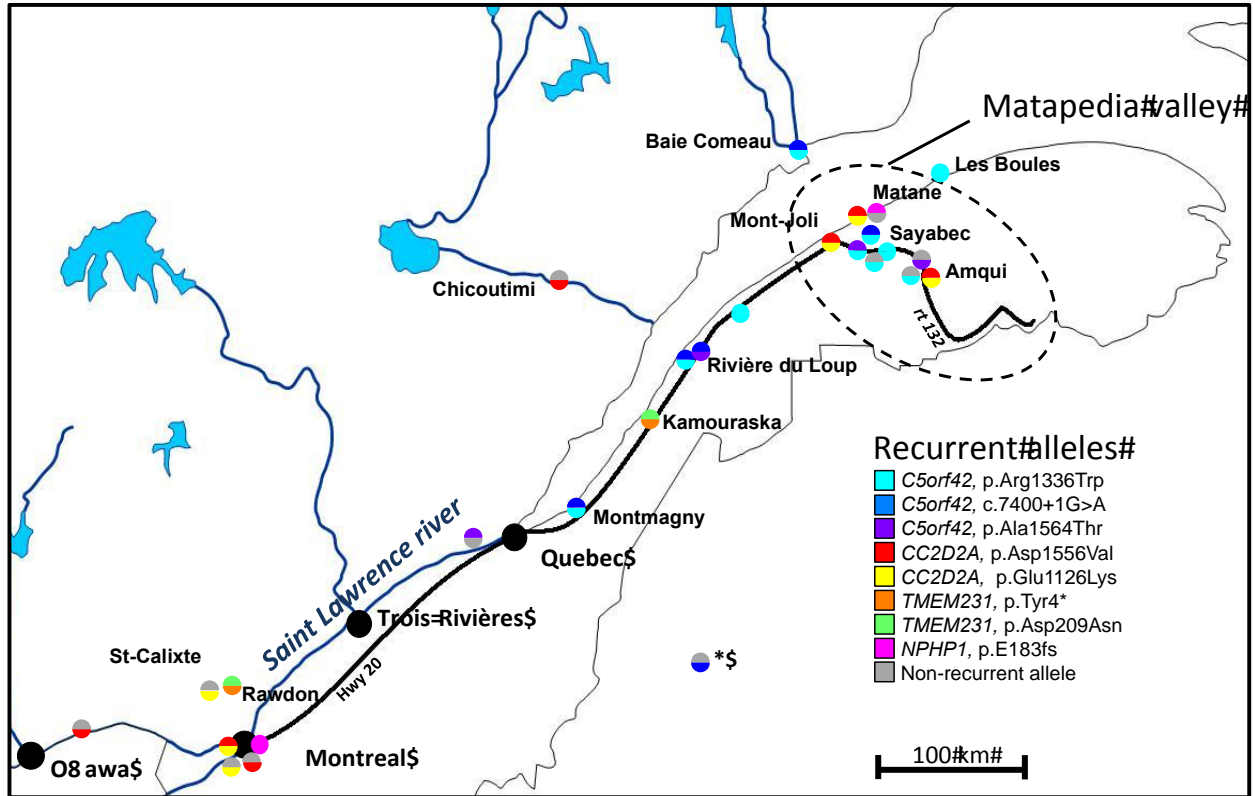

**Figure S4.** Map of Quebec showing the geographic distribution of the recurrent FC JBTS alleles. \*Note that this individual is of FC ancestry, but born and living in the Unites States of America.

**Table S2. Rare homozygous and potentially compound heterozygous variants in individual 1763.618**

| Chr | Position (hg 19) | Ref Allele | Alt Allele | Variant                              | dbSNP       | 1KG (MAF) | EVS (MAF) | ExAC (MAF) | SIFT score | PolyPhen-2 | Zygotity |
|-----|------------------|------------|------------|--------------------------------------|-------------|-----------|-----------|------------|------------|------------|----------|
| 1   | 3756170          | A          | G          | CEP104:NM_014704:c.735+2T>C          | NR          | NR        | NR        | NR         | NA         | NA         | Homoz.   |
| 8   | 145024570        | C          | T          | PLEC:NM_201380:c.G305A:p.R102H       | rs200335928 | NR        | 0.0048    | 0.0026     | 0.00 (D)   | 0.93 (PD)  | Homoz.   |
| 2   | 186653963        | G          | C          | FSIP2:NM_173651:c.G2367C:p.L789F     | NR          | NR        | NR        | NR         | 0.00 (D)   | 0.99 (PD)  | Het.     |
| 2   | 186660153        | C          | A          | FSIP2:NM_173651:c.C8557A:p.P2853T    | NR          | NR        | NR        | NR         | 0.16 (T)   | NA         | Het.     |
| 7   | 28995453         | T          | C          | TRIL:NM_014817:c.A2209G:p.T737A      | rs552268645 | NR        | NR        | 0.0008     | NA         | NA         | Het.     |
| 7   | 28995666         | C          | T          | TRIL:NM_014817:c.G1996A:p.G666R      | rs562686571 | NR        | NR        | 0.0009     | NA         | 0.04 (B)   | Het.     |
| 7   | 149482585        | C          | T          | SSPO:NM_198455:c.C3001T:p.R1001W     | rs199648588 | NR        | 0.0025    | 0.003      | 0.01 (D)   | 1.0 (PD)   | Het.     |
| 7   | 149502579        | C          | T          | SSPO:NM_198455:c.C8392T:p.R2798C     | rs181269877 | 0.0041    | 0.0037    | 0.006      | NA         | 1.0 (PD)   | Het.     |
| 8   | 145732114        | G          | C          | GPT:NM_005309:c.G1288C:p.E430Q       | rs141505249 | 0.0027    | 0.0016    | 0.004      | 0.33 (T)   | 0.03 (B)   | Het.     |
| 8   | 145732180        | G          | C          | GPT:NM_005309:c.G1354C:p.V452L       | rs147998249 | 0.0027    | 0.0016    | 0.004      | 0.01 (D)   | 0.2 (B)    | Het.     |
| 9   | 137676938        | A          | T          | COL5A1:NM_000093:c.A2588T:p.E863V    | rs139788610 | NR        | 0.00077   | 0.0004     | 0.00 (D)   | 0.986 (PD) | Het.     |
| 9   | 137701080        | G          | A          | COL5A1:NM_000093:c.G3418A:p.V1140M   | rs149616140 | NR        | 0.00046   | 0.0008     | 0.03 (D)   | 0.99 (PD)  | Het.     |
| 10  | 91498041         | C          | T          | KIF20B:NM_016195:c.C3323T:p.A1108V   | rs117564945 | 0.0009    | 0.0031    | 0.0044     | 0.31 (T)   | 0.0 (B)    | Het.     |
| 10  | 91520368         | T          | A          | KIF20B:NM_016195:c.T4646A:p.F1549Y   | rs117258675 | 0.0009    | 0.003     | 0.0045     | 0.15 (T)   | 0.302 (B)  | Het.     |
| 17  | 18881091         | G          | A          | FAM83G:NM_001039999:c.C1888T:p.R630W | rs201046878 | NR        | 0.0023    | 0.0026     | 0.00 (D)   | 0.97 (PD)  | Het.     |
| 17  | 18907165         | G          | A          | FAM83G:NM_001039999:c.C190T:p.L64F   | rs371100508 | NR        | 0.00008   | 0.00002    | 0.01 (D)   | 0.926 (PD) | Het.     |
| 17  | 73237124         | T          | C          | GGA3:NM_138619:c.A961G:p.S321G       | rs146877619 | 0.0009    | 0.0025    | 0.0021     | 0.31 (T)   | 0.0 (B)    | Het.     |
| 17  | 73239557         | T          | C          | GGA3:NM_138619:c.A395G:p.K132R       | rs117805695 | 0.0014    | 0.0026    | 0.0022     | 0.1 (T)    | 0.001 (B)  | Het.     |

B, benign; D, damaging; NR, not reported; NA, not available; PD, probably damaging; T, tolerated; Het., heterozygous; Homoz., homozygous
